# Supplementary material for: Photocatalytic evaluation of CuO and ZnO crystallites synthesized hydrothermally using binary eugenol/iso-eugenol mixtures: isomer effects on the capping propensity of biogenic agents
Source: Royal Society of Chemistry journal article supplement (doi:10.1039/d3nj05237k), 2024-01-01
Supplement: d3nj05237k1.pdf [file d3nj05237k1.pdf]

**Photocatalytic evaluation of CuO and ZnO crystallites synthesized hydrothermally using binary Eugenol /iso-eugenol mixtures. Isomer effect on capping propensity of biogenic agents**

Tabee Jan<sup>a</sup>, S. V. Sawant<sup>b</sup>, T. V. Manolikar<sup>b</sup>, S.S.Sakate<sup>b</sup>, S.K. Pardeshi<sup>c</sup>, R. M. Jagtap<sup>bc\*</sup> and Masood Ahmad Rizvi<sup>a\*</sup>

<sup>a</sup> Department of Chemistry, *Progressive Education Society's* Modern College of Arts, Science and Commerce (*Autonomous*), Shivajinagar, Pune-411005, India.

<sup>b</sup> Department of Chemistry, Savitribai Phule Pune University (*formerly University of Pune*), Ganeshkhind, Pune-411007, India

<sup>c</sup> Department of Chemistry, University of Kashmir, Hazratbal, Srinagar, Jammu and Kashmir-190006, India.

\*Corresponding authors Email: [jagtapchemistry@moderncollegepune.edu.in](mailto:jagtapchemistry@moderncollegepune.edu.in) and [masoodku2@gmail.com](mailto:masoodku2@gmail.com)

**Supplementary Data:**

**Fig.S1:** SEM micrographs of CuO and ZnO series materials

**Fig.S2:** Particle size distribution plots of CuO series and ZnO series materials

**Fig. S3:** Absorption spectra of CuO and ZnO series materials

**Figure S4:** Tauc plots of CuO and ZnO series photocatalysts

**Figure S5:** Degradation plots of M.B, PAN,C.V and DCP-IP using CuO series photocatalysts

**Figure S6:** Degradation plots of M.B, PAN,C.V and DCP-IP using ZnO series photocatalysts

**Figure S7:** Kinetic plots for NBT degradation

**Fig.S8** FTIR spectra depicting oxidation of benzaldehyde using CuO-5 and ZnO-5 catalysts

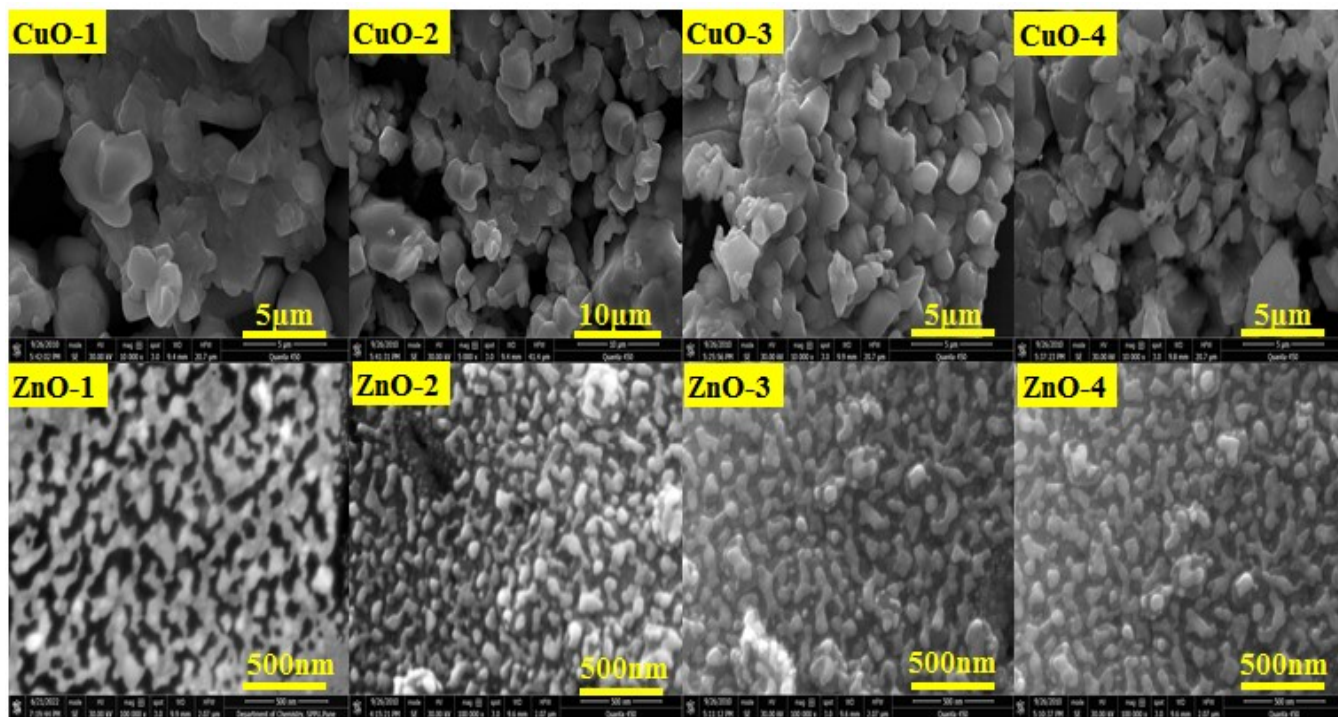

**Fig.S1** SEM micrographs of CuO and ZnO series materials depicting fine granular and peanut shaped morphology of CuO and ZnO crystallites using different binary EIM mixtures.

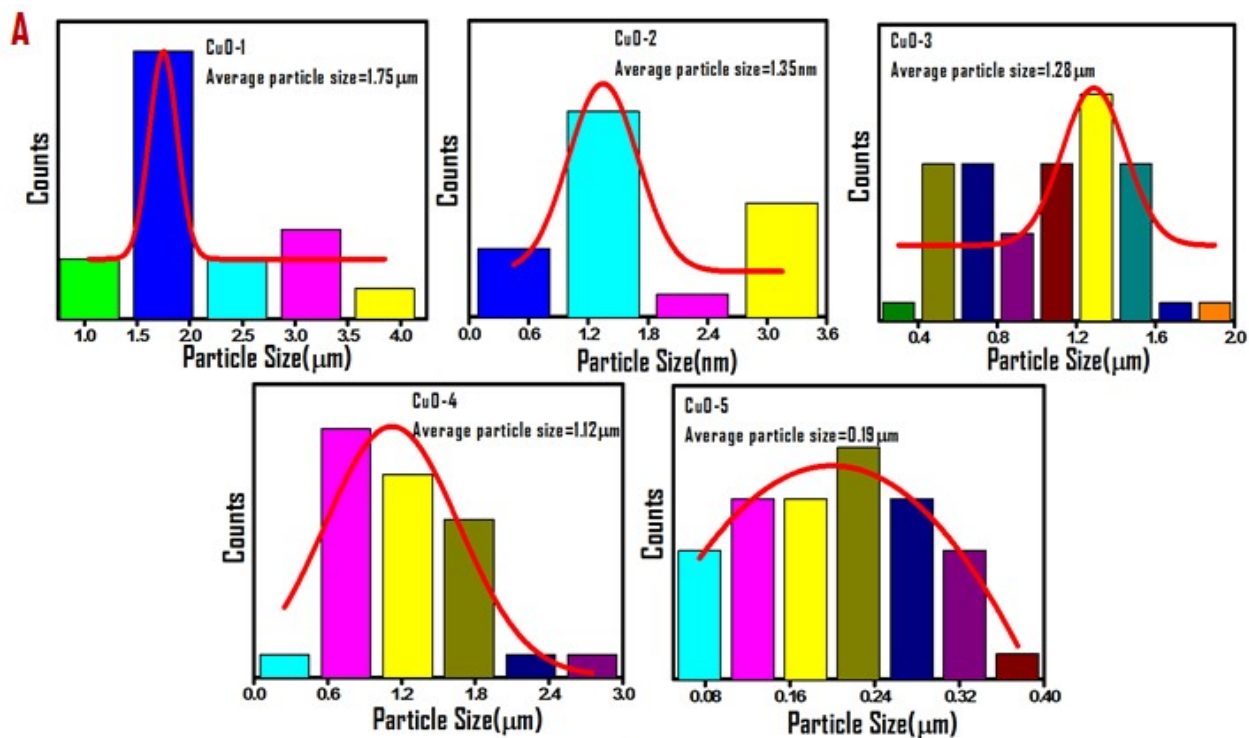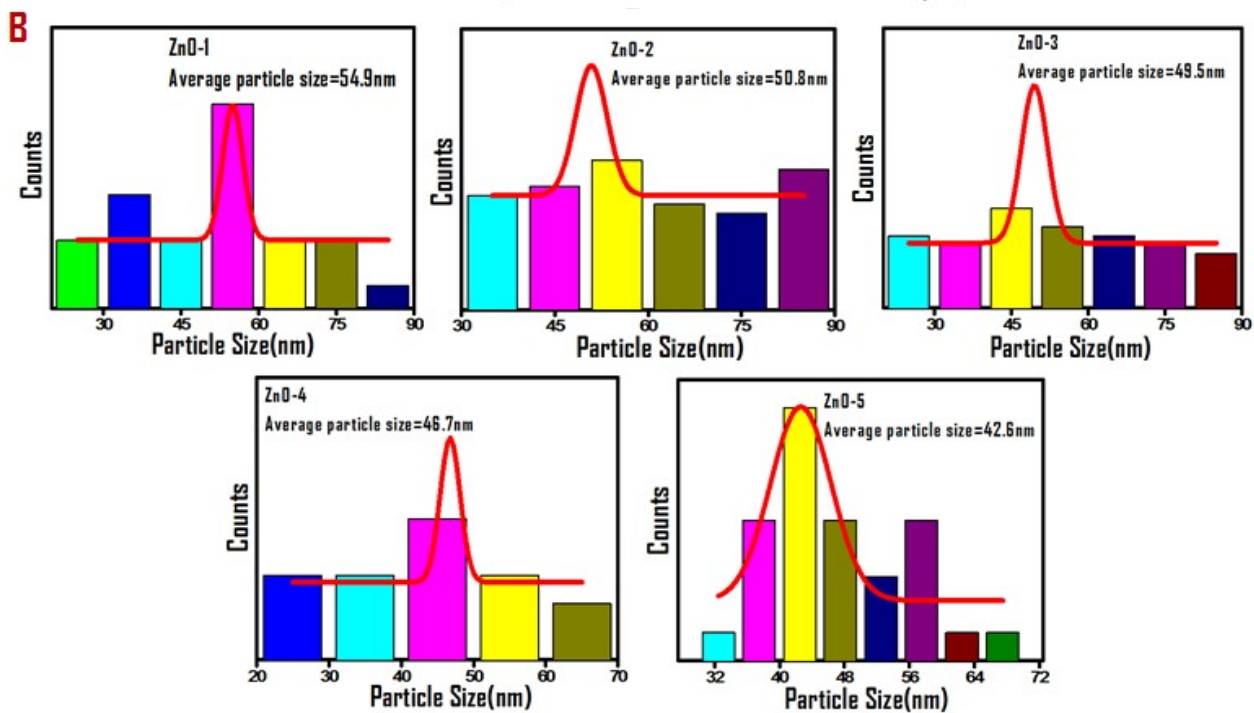

**Fig.S2** Particle size distribution plots of: (A) CuO series (B) ZnO series materials synthesized using different binary EIM mixtures (1,5 represent pure isoeugenol and eugenol respectively) (Gaussian curve fitting red line).

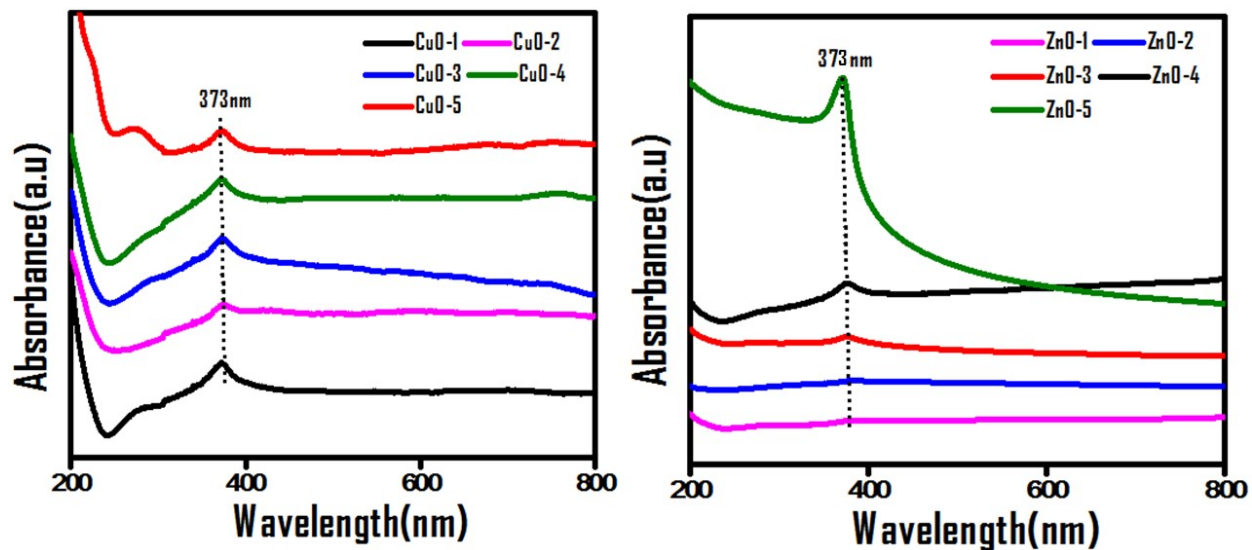

**Fig.S3** Absorption spectra of CuO and ZnO series materials depicting distinctive peak at 373nm corresponding to CuO and ZnO (1,5 represent pure isoeugenol and eugenol respectively).

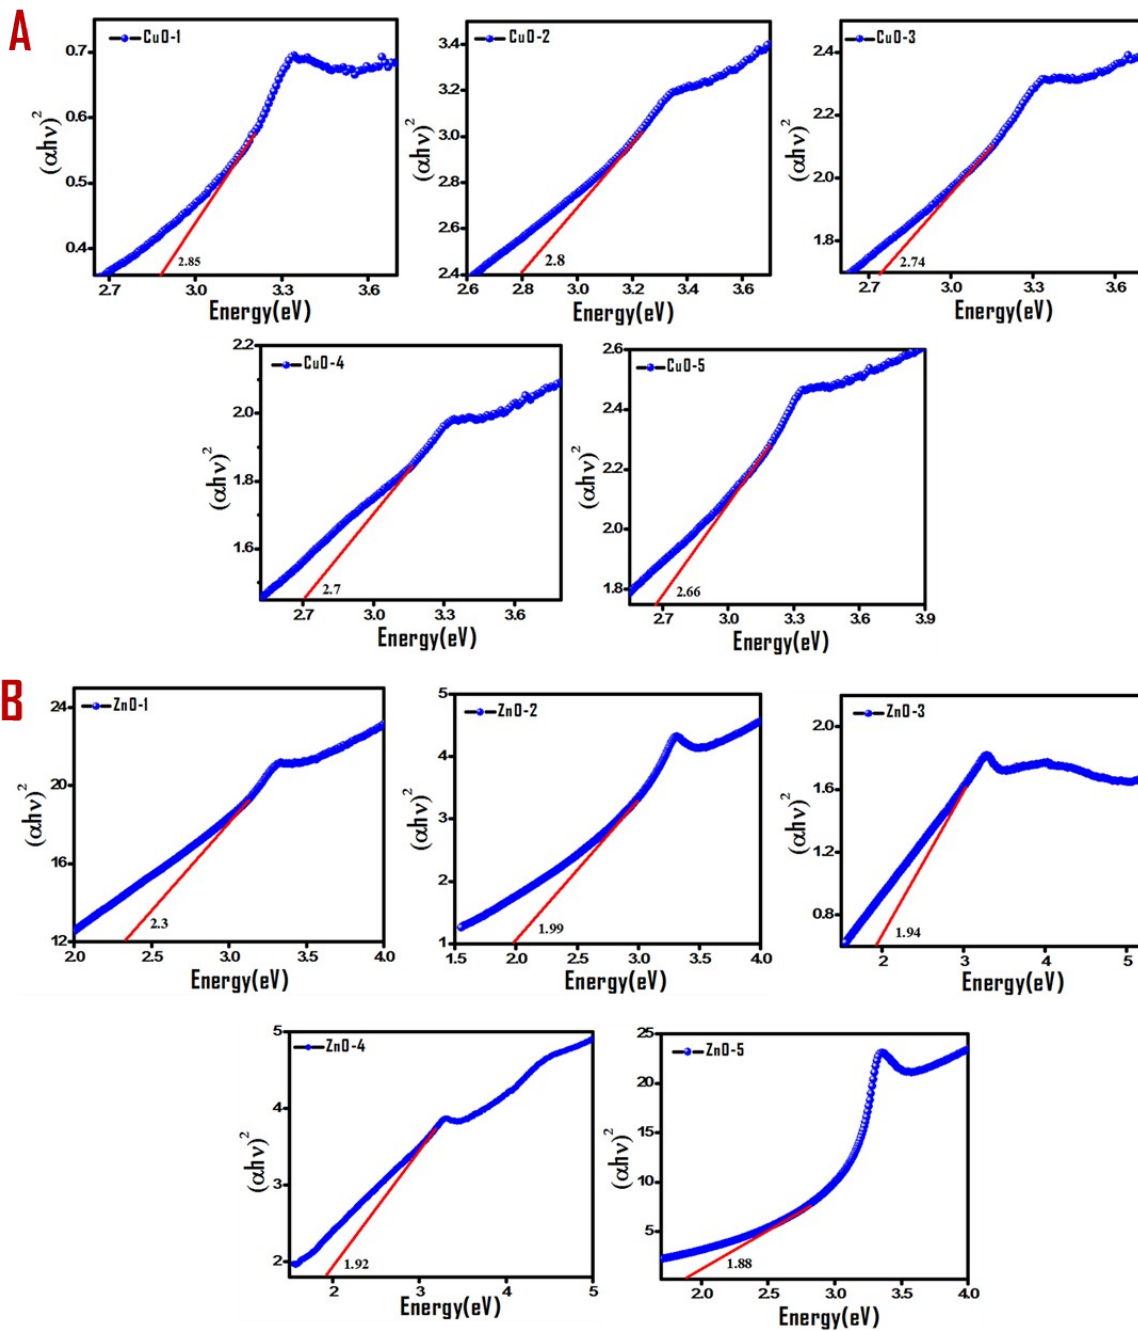

**Fig.S4** Tauc plots for calculating energy band gaps of (A) CuO series photocatalysts and (B) ZnO series photocatalysts (1,5 represent pure isoeugenol and eugenol respectively).

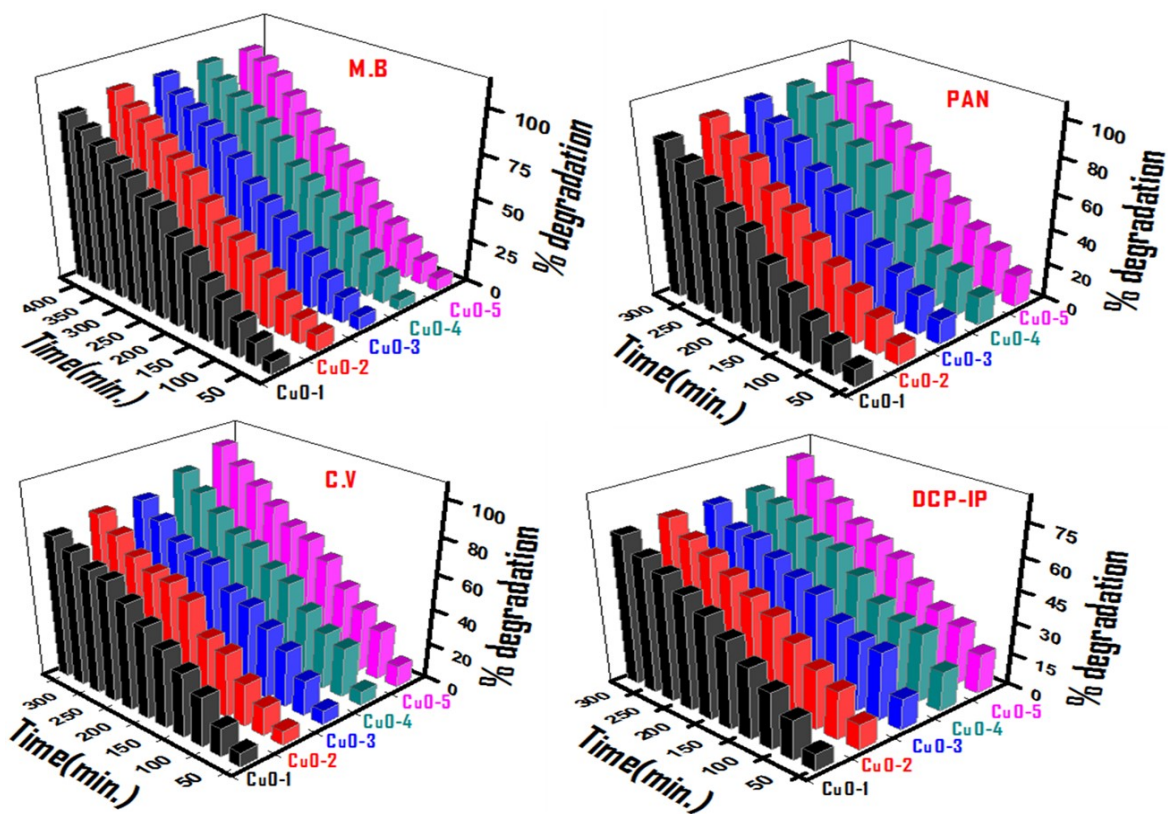

**Fig.S5** Photodegradation rates of M.B, PAN, C.V and DCP-IP dyes in presence of CuO series photocatalysts under natural sunlight (1,5 represent pure isoeugenol and eugenol respectively).

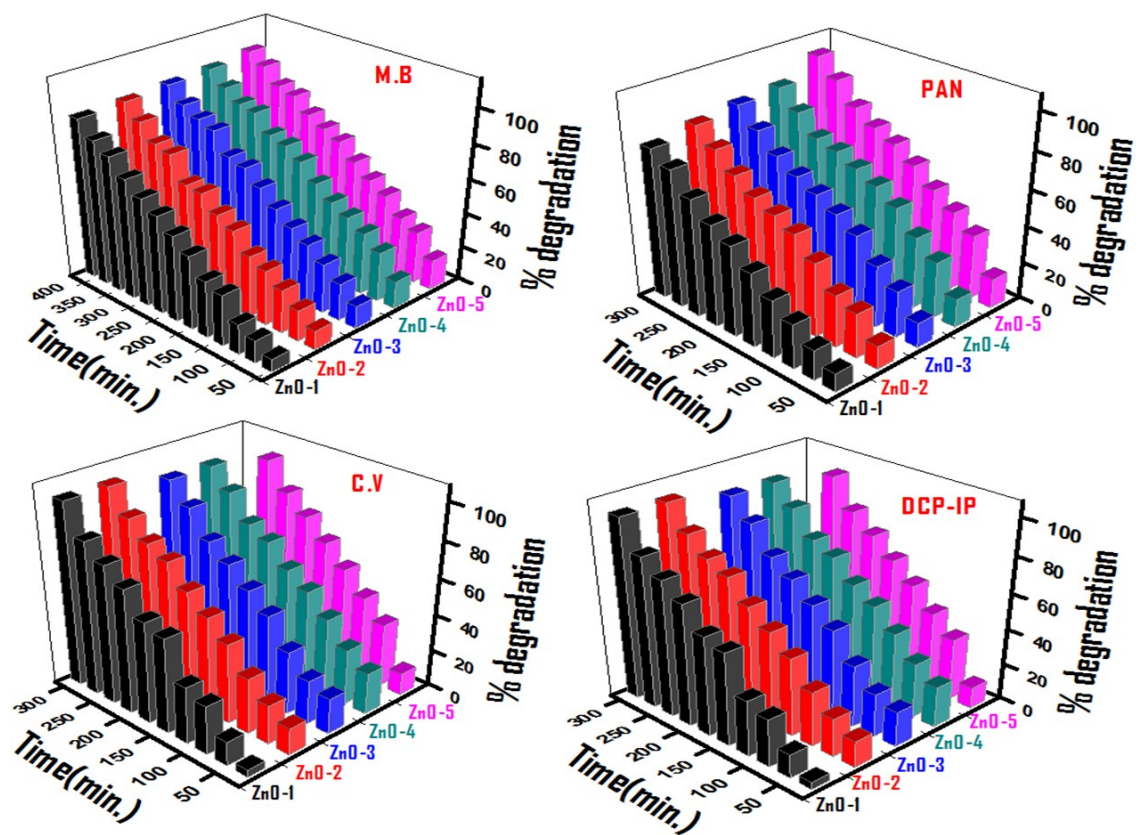

Fig.S6 Photodegradation rates of M.B,PAN,C.V and DCP-IP dyes in presence of ZnO series photocatalysts under natural sunlight (1,5 represent pure isoeugenol and eugenol respectively)

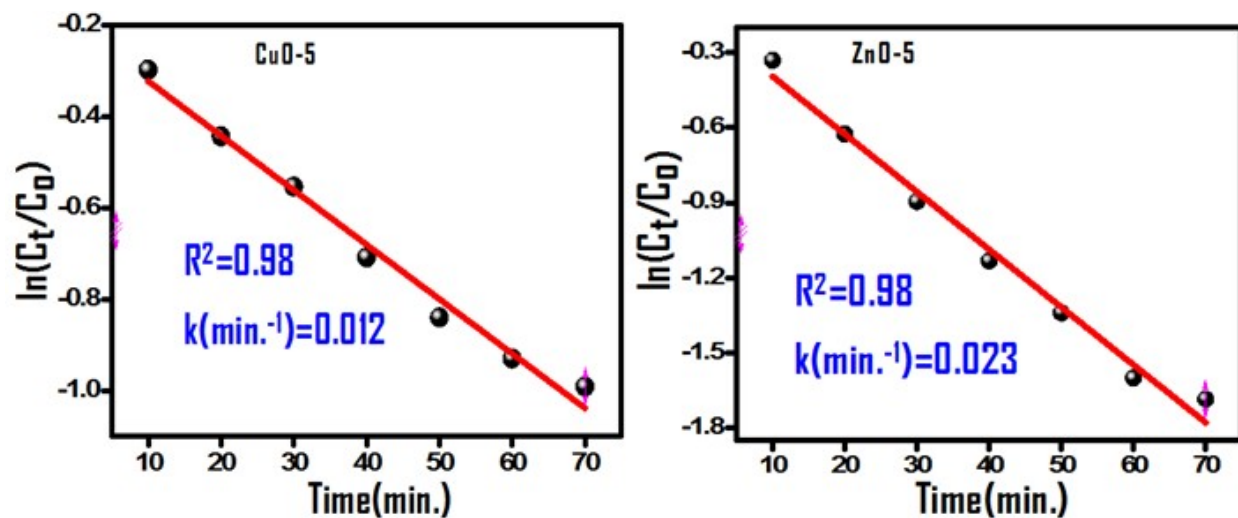

Fig.S7 Pseudo-first order kinetic plots for NBT degradation using CuO-5 and ZnO-5 photocatalysts (5 represents pure eugenol)

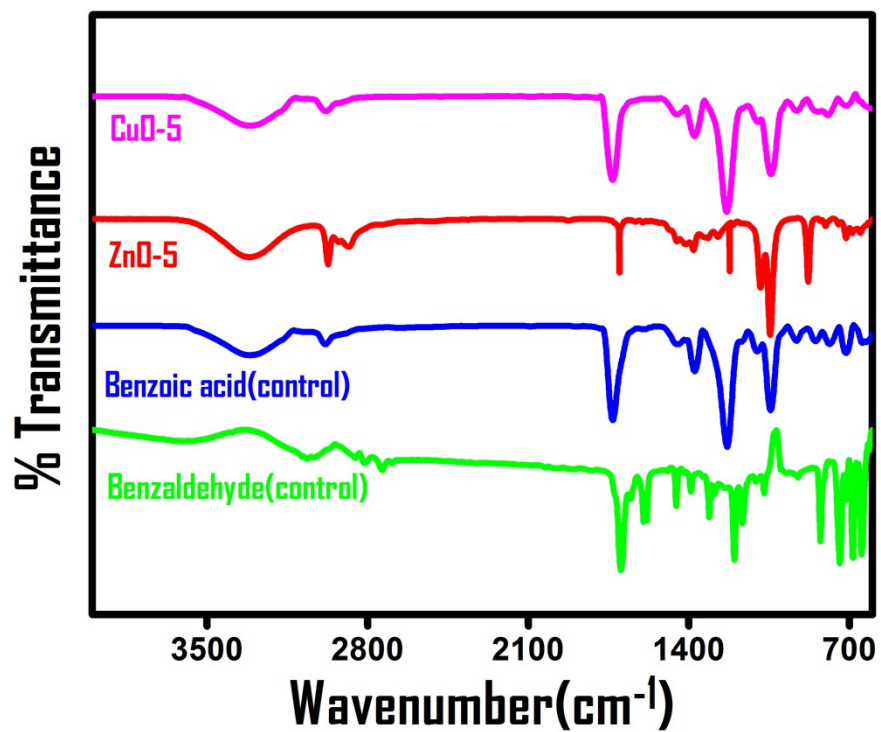

Fig.S8 FTIR spectra depicting oxidation of benzaldehyde to benzoic acid over CuO-5 and ZnO-5 catalyst surfaces (5 represents pure eugenol).
